# Supplementary material for: Morphological dependent exciton dynamics and thermal transport in MoSe2 films
Source: Royal Society of Chemistry journal article supplement (doi:10.1039/d3na00164d), 2023-01-01
Supplement: d3na00164d1.pdf [file d3na00164d1.pdf]

## SUPPORTING INFORMATION

### Morphological Dependent Exciton Dynamics and Thermal Transport in MoSe<sub>2</sub> Film

Jay Deep Gupta, Priyanka Jangra, Bishnu Pada Majee, and Ashish Kumar Mishra

School of Materials Science and Technology, Indian Institute of Technology (Banaras Hindu University), Varanasi-221005, India

Email: [akmishra.mst@iitbhu.ac.in](mailto:akmishra.mst@iitbhu.ac.in)

#### S1. Schematic of CVD synthesis

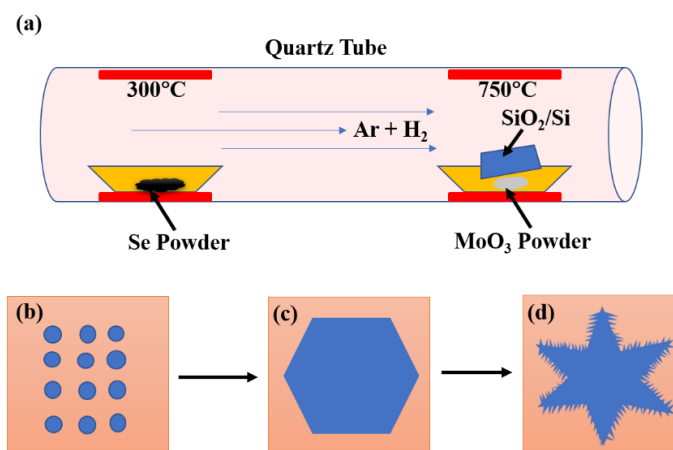

**Fig. S1** Schematic diagram of (a) CVD setup to synthesize MoSe<sub>2</sub> and (b, c, d) the growth mechanism for hexagonal and snowlike MoSe<sub>2</sub>.

#### S2. Raman mapping

The room temperature Raman mapping of MoSe<sub>2</sub> film clearly shows the presence of defect (D) peak throughout the region in snowlike MoSe<sub>2</sub>, whereas it is missing in hexagonal MoSe<sub>2</sub>.

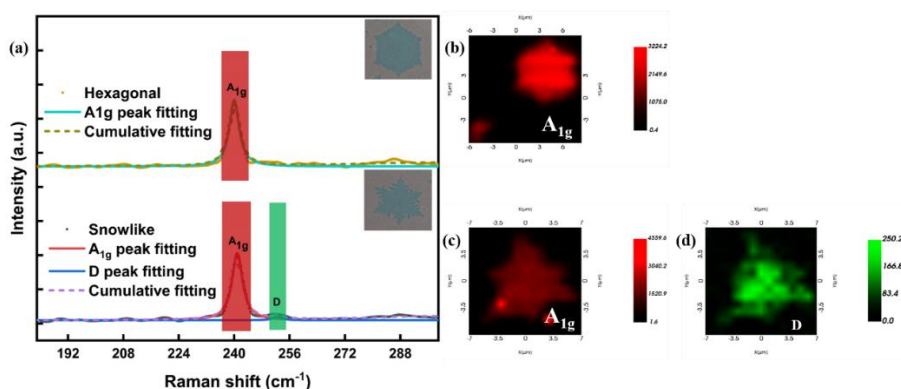

**Fig. S2** (a) Raman spectra of hexagonal (up) and snowlike (down) MoSe<sub>2</sub> with Raman mapping images (b, c) corresponding to A<sub>1g</sub> peak and (d) corresponding to defect (D) peak of MoSe<sub>2</sub>.

### S3. Density functional studies

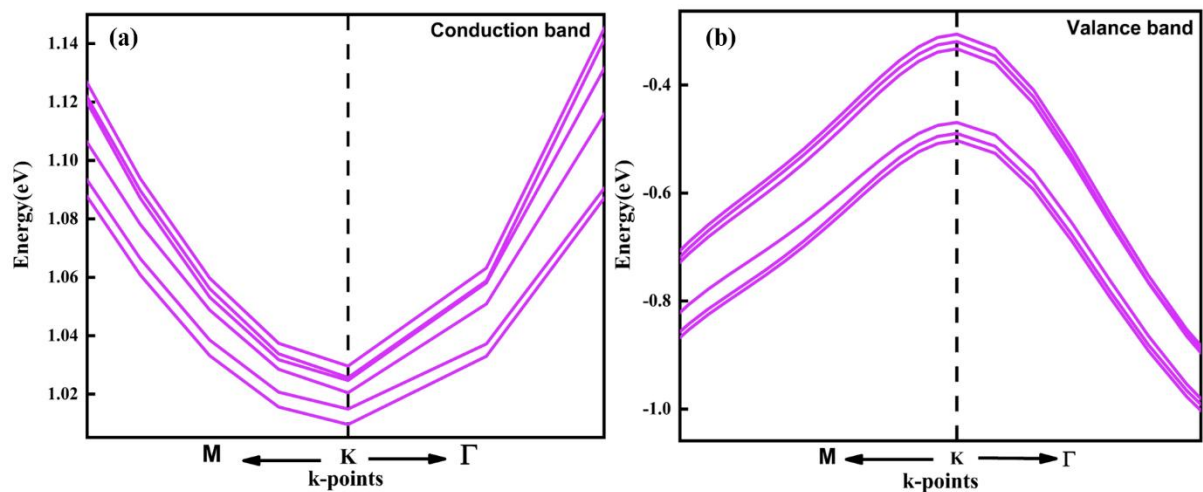

**Fig. S3** Breaking of degeneracy in (a) conduction band and (b) valance band at K- point for 3L-MoSe<sub>2</sub> due to absence of inversion symmetry.

### S4. Configurational coordinate diagram

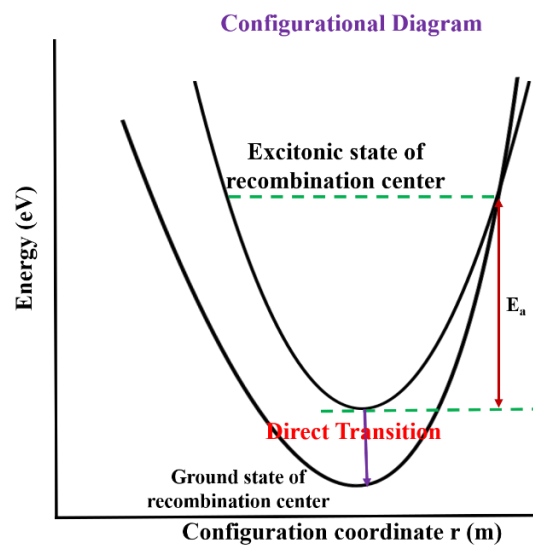

**Fig. S4** Configurational diagram depicting Mott-Seitz mechanism in MoSe<sub>2</sub>.

### S5. FWHM of temperature-dependent PL

The variations of full width at half maximum (FWHM) for high energy exciton ( $E_H$ ) of snowlike and hexagonal MoSe<sub>2</sub> film in the temperature range 93-300 K are shown in **Fig. S5**. Due to defect-related inhomogeneous broadening and enhanced phonon–exciton interaction, the FWHM for the A exciton increases linearly with increasing temperature. The lattice vibrations increase at higher temperatures, which enhances electron-phonon scattering.

Additionally, the nonradiation process causes an increase in FWHM and decrease in PL intensity.

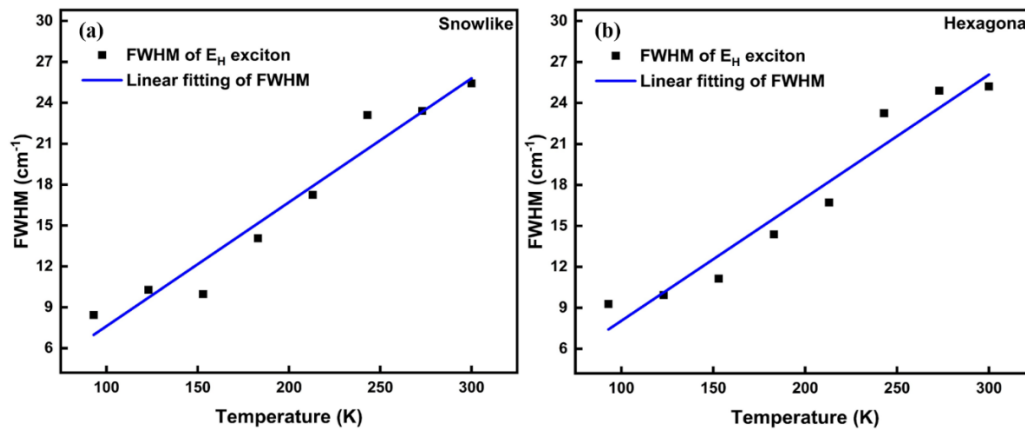

**Fig. S5** Temperature dependence of FWHM for PL spectra of (a) snowlike (b) hexagonal MoSe<sub>2</sub> film over SiO<sub>2</sub>/Si using LWD 50X objective lens.

### S6. Temperature-dependent Raman

Temperature-dependent Raman spectra at remaining temperatures for prepared snowlike and hexagonal MoSe<sub>2</sub> film are shown in **Fig. S6**. The corresponding variation of FWHM for Raman modes are shown, indicating increase in FWHM with temperature.

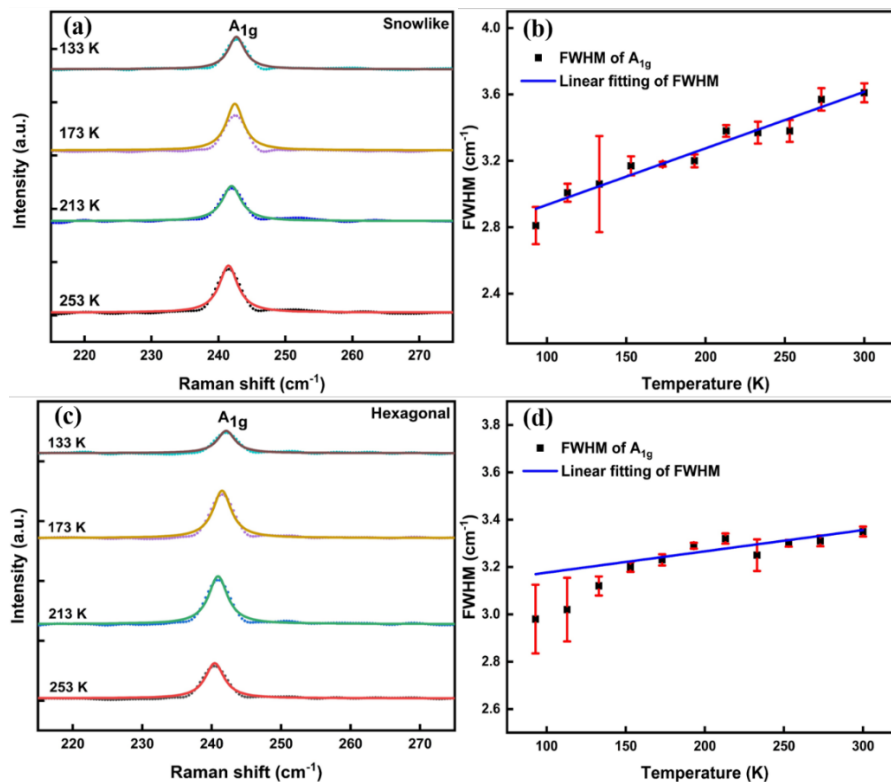

**Fig. S6** Temperature-dependent Raman spectra for (a) snowlike and (c) hexagonal MoSe<sub>2</sub> film and (b, d) their corresponding FWHM, using LWD 50X objective lens.

## S7. Power-dependent Raman

Power-dependent Raman spectra using 100X objective lens for prepared snowlike and hexagonal MoSe<sub>2</sub> film over SiO<sub>2</sub>/Si substrate are shown in **Fig. S7**. In **Fig. S7**, we observe that the incident laser power causes an increase in the FWHM of the A<sub>1g</sub> mode. The lattice expansion and bond softening are the primary reason for the observed redshift in Raman modes and rise in FWHM with laser intensity.

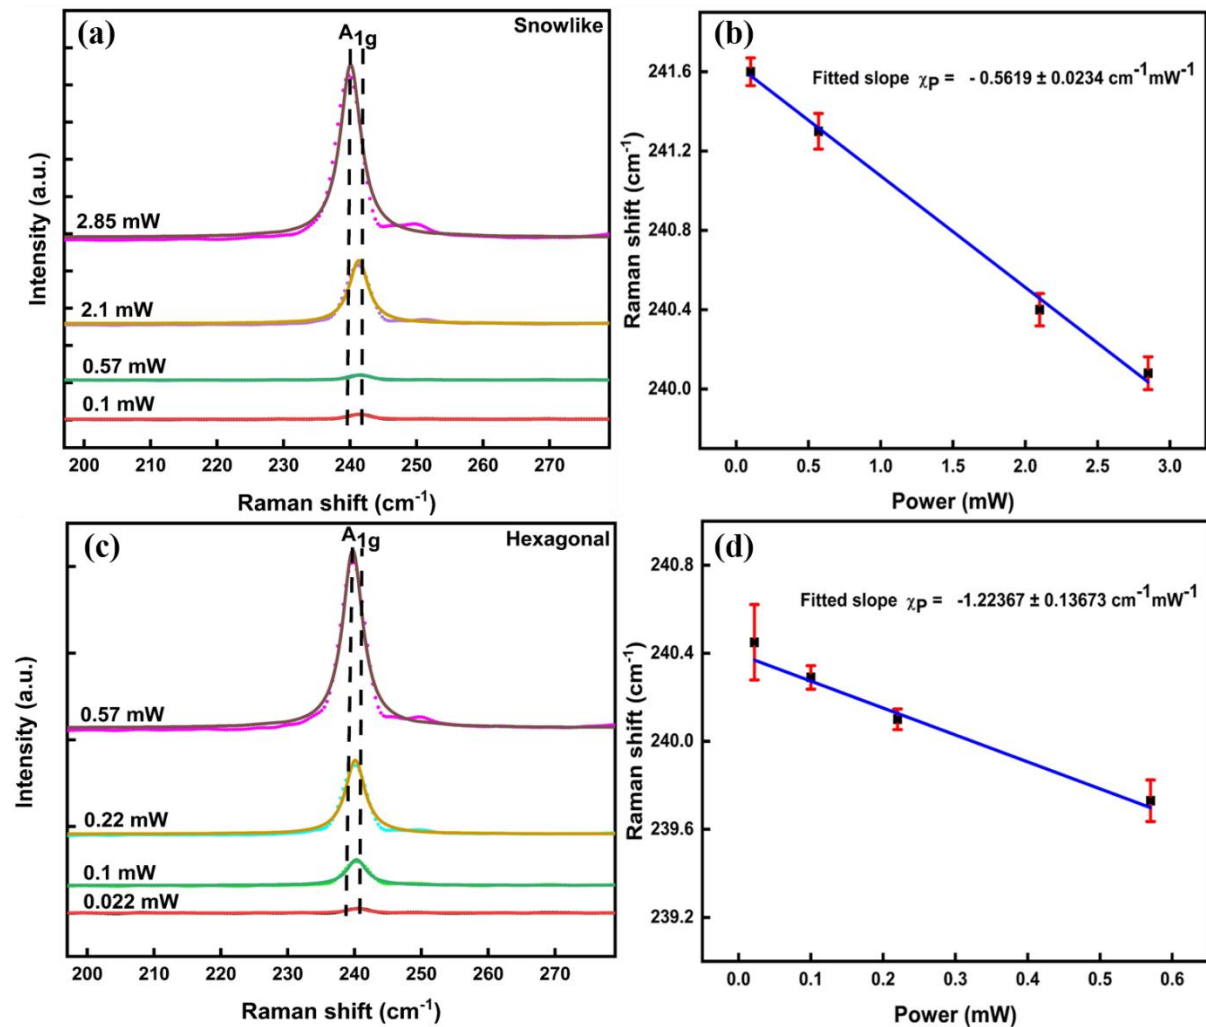

**Fig. S7** Lorentzian fitted power-dependent Raman spectra for (a) snowlike and (c) hexagonal MoSe<sub>2</sub> and (b,d) their corresponding Raman shifts with incident laser power, using 100X objective lens.

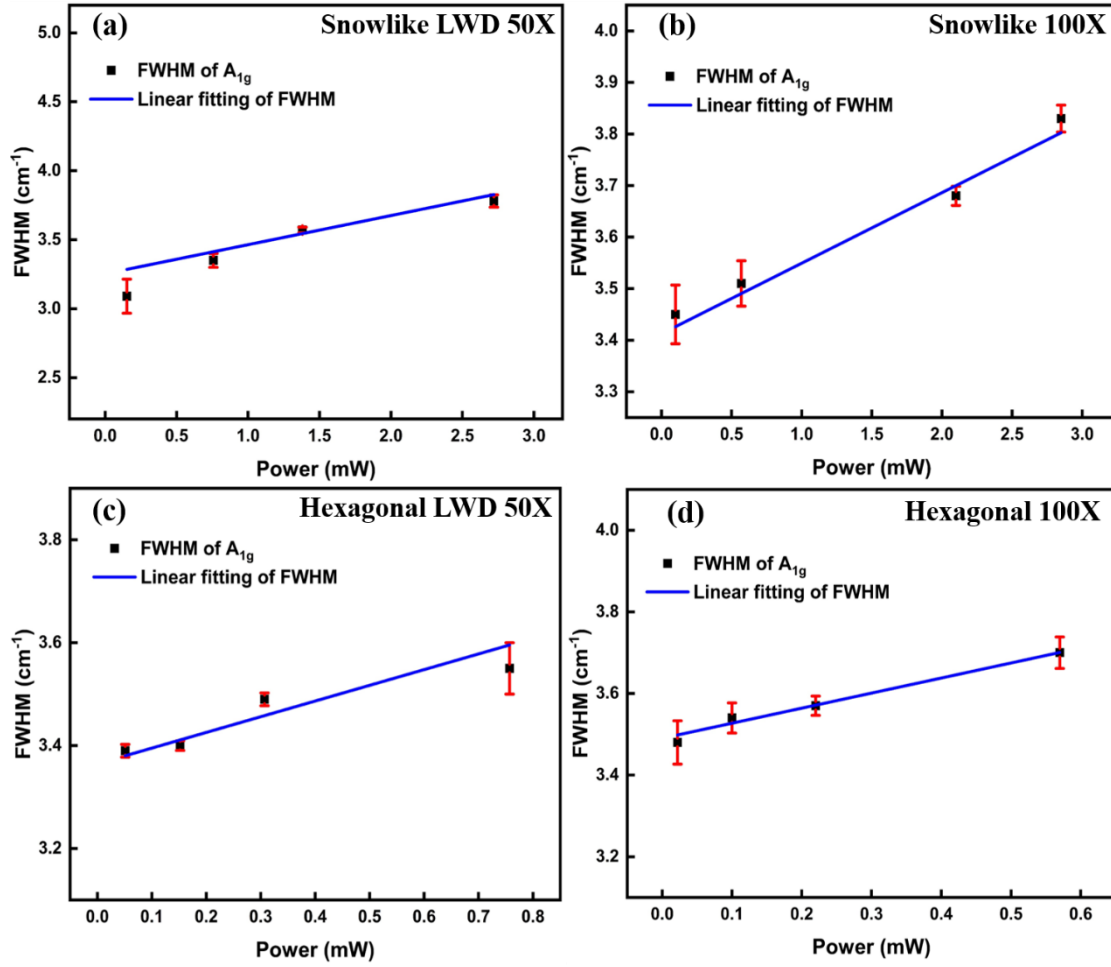

**Fig. S8** Power dependence of FWHM using LWD 50X objective lens for (a) snowlike MoSe<sub>2</sub>, and (c) hexagonal MoSe<sub>2</sub> film; power dependence of FWHM using 100X objective lens for (b) snowlike MoSe<sub>2</sub>, and (d) hexagonal MoSe<sub>2</sub> film.

### S8. Calculations of laser spot size at different objective lenses

The minimum laser spot size by the following formula can be given by<sup>S1-S4</sup>

$$r_0 = \frac{\lambda}{\pi \times N.A} nm \quad (1)$$

Where, N.A is the numerical aperture of the objective lens and wavelength of the laser is denoted by  $\lambda$ .

For 100X objective lens (N.A.= 0.9),  $r_0 = \frac{532}{3.14 \times 0.9} = 0.188 \sim 0.19 \mu m$

Similarly, for LWD 50X (N.A.=0.6),  $r_0 = 0.282 \sim 0.28 \mu m$

Thus, the radius of the laser spot size for 100X and LWD 50X lenses are  $\sim 0.19 \times 10^{-6} m$  and  $\sim 0.28 \times 10^{-6} m$ , respectively.

### S9. Calculation of $\alpha_a$ value for trilayer MoSe<sub>2</sub>

For supported monolayer MoSe<sub>2</sub> we have chosen the value of absorption coefficient ( $\alpha$ ) 0.057 according to reported literature<sup>S5</sup> then we calculated the value of trilayer MoSe<sub>2</sub> absorption coefficient by using the following equation<sup>S6</sup>

$$\alpha_{a_{n+1}} = \alpha_{a_n} + (1 - \alpha_{a_n})\alpha_{a_{SL}} \quad (2)$$

$$\alpha_{a_2} = 0.057 + (1 - 0.057)0.057 = 0.111$$

$$\alpha_{a_3} = 0.111 + (1 - 0.111)0.057 = 0.161$$

### S10. Calculations of $R_m$ values at different objective lenses:

#### (a) Snowlike shaped MoSe<sub>2</sub> film

$$\chi_P = -0.4797 \text{ cm}^{-1}\text{mW}^{-1} \text{ for LWD 50X objective lens}$$

$$\chi_P = -0.5619 \text{ cm}^{-1}\text{mW}^{-1} \text{ for 100X objective lens}$$

$$\chi_T = -0.0096 \text{ cm}^{-1}\text{K}^{-1}$$

Therefore,

$$R_{m1} = \chi_P / \alpha \chi_T = 3.2886 \times 10^5 \text{ KW}^{-1}$$

$$R_{m2} = \chi_P / \alpha \chi_T = 3.8521 \times 10^5 \text{ KW}^{-1}$$

#### (b) Hexagonal shaped MoSe<sub>2</sub> film

$$\chi_P = -0.8307 \text{ cm}^{-1}\text{mW}^{-1} \text{ for LWD 50X objective lens}$$

$$\chi_P = -1.2236 \text{ cm}^{-1}\text{mW}^{-1} \text{ for 100X objective lens}$$

$$\chi_T = -0.0115 \text{ cm}^{-1}\text{K}^{-1}$$

Therefore,

$$R_{m1} = \chi_P / \alpha \chi_T = 4.4871 \times 10^5 \text{ KW}^{-1}$$

$$R_{m2} = \chi_P / \alpha \chi_T = 6.6086 \times 10^5 \text{ KW}^{-1}$$

## References:

- S1. W. Cai, A. L. Moore, Y. Zhu, X. Li, S. Chen, L. Shi and R. S. Ruoff, *Nano Letter*, 2010, **10**, 1645–1651.
- S2. R. Yan, J. R. Simpson, S. Bertolazzi, J. Brivio, M. Watson, X. Wu, A. Kis, T. Luo, A. R. Hight Walker, H. G. Xing, *ACS Nano*, 2014, **8**, 986–993.
- S3. A. P. Gertych, A. Łapińska, K. Czerniak-Łosiewicz, A. Dużyńska, M. Zdrojek, J. Judek, *Scientific reports*, 2019, **9**, 1-7.
- S4. B. P. Majee, J. D. Gupta, A. Sanskrityayn and A. K Mishra, *Journal of Physical Chemistry C*, 2021, **125**, 14865–14873.
- S5. X. Zhang, D. Sun, Y. Li, G. H. Lee, X. Cui, D. Chenet, Y. You, T. F. Heinz and J. C. Hone, *ACS Applied Materials & Interfaces*, 2015, **7**, 25923–25929.
- S6. J. Judek, A. P. Gertych, M. Winiarski, A. Lapińska, A. Duzuńska, M. Zdrojek, *Scientific reports*, 2015, **5**, 1-11.
